# Supplementary material for: Selective Pressure Causes an RNA Virus to Trade Reproductive Fitness for Increased Structural and Thermal Stability of a Viral Enzyme
Source: PubMed Central journal article supplement (PMC3510033; doi:10.1371/journal.pgen.1003102), 2012-11-29
Supplement: pgen.1003102.s002.pdf [file pgen.1003102.s002.pdf]

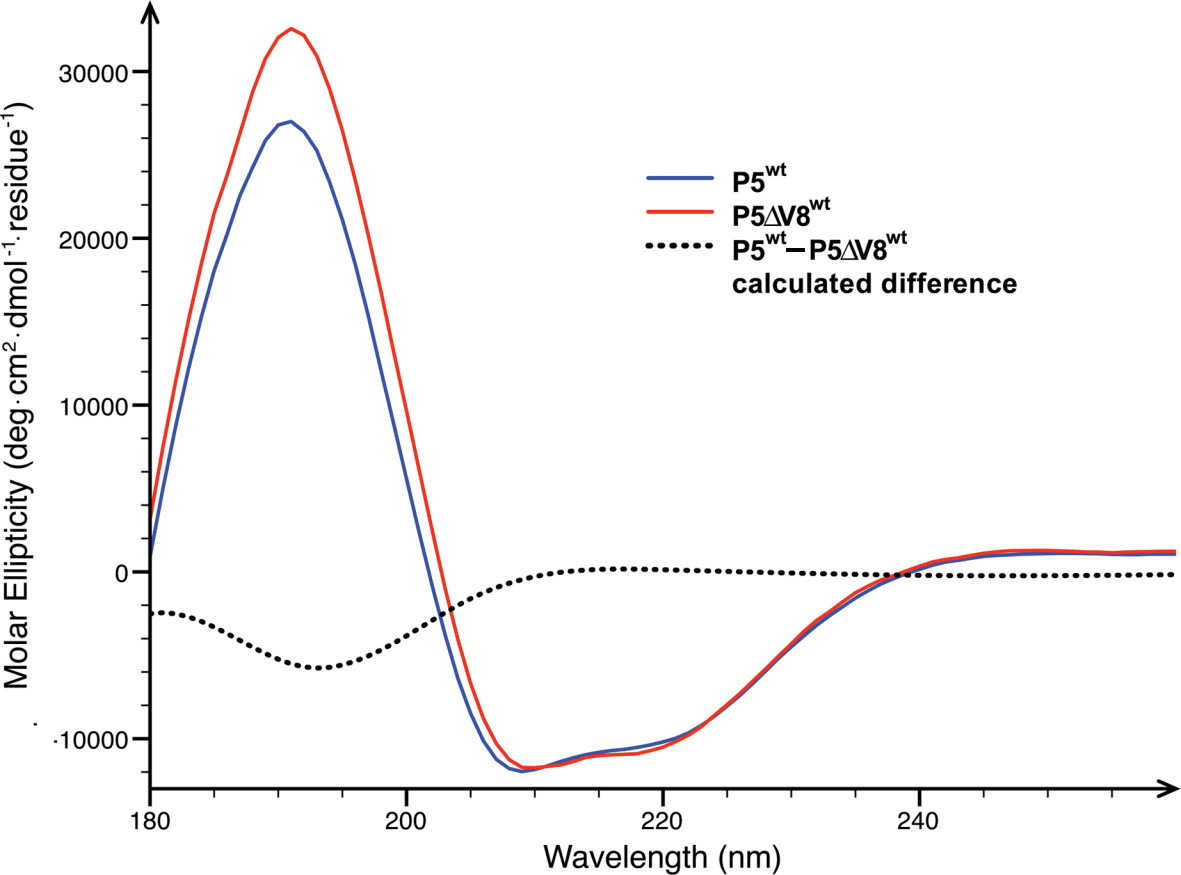

**Supplementary Figure 2**
